# Supplementary material
Source: Springer Nature journal article supplement (https://www.springermedizin.de/resource/supplementary/12985_2007_263_MOESM4_ESM.pdf/9607670)

M13 bacteriophages with  $1.1 \times 10^3$  pfu  
Laser wavelength = 425 nm  
Pulse width = 100 fs

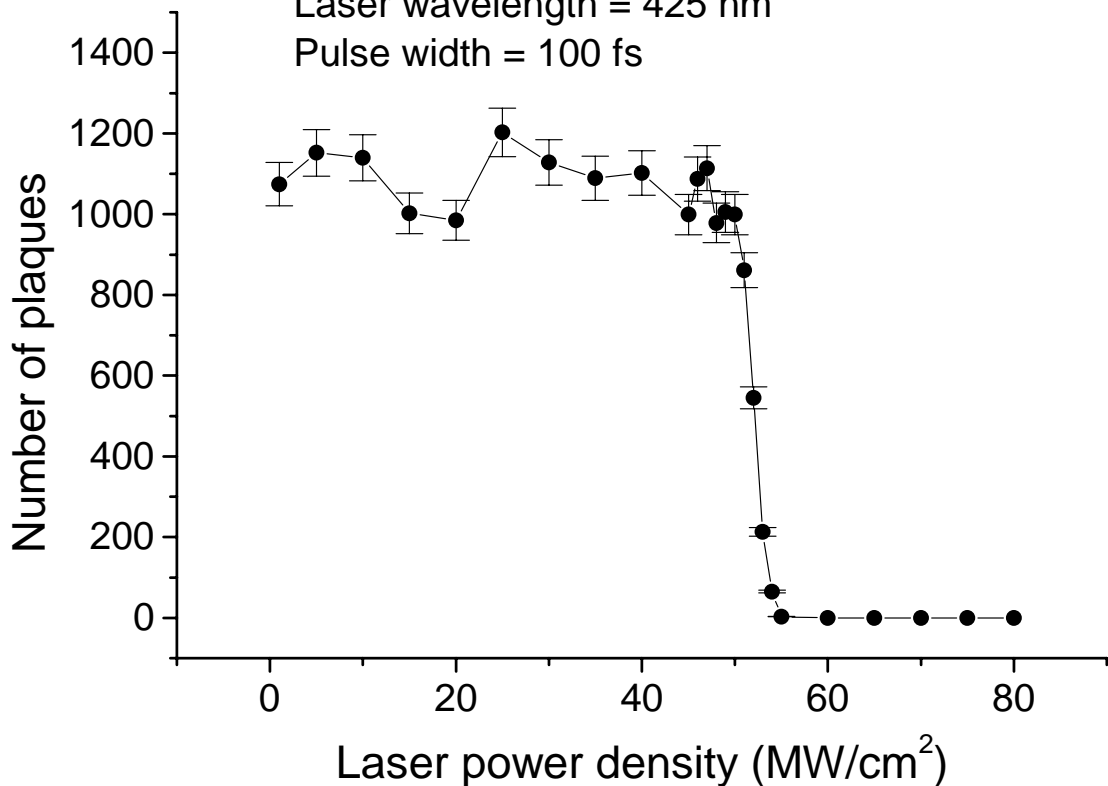

Supplement: MOESM4 [file 9607670]
